# Supplementary material for: Three-dimensional highly conductive silver nanowires sponges based on cotton-templated porous structures for stretchable conductors
Source: Royal Society of Chemistry journal article supplement (doi:10.1039/c6ra25260e), 2016-12-22
Supplement: c6ra25260e1.pdf [file c6ra25260e1.pdf]

## Supporting Information

### Three-Dimensional Highly Conductive Silver Nanowires Sponges Based on Cotton-templated Porous Structures for Stretchable Conductors

By Chun-Hua Zhu, Li-Ming Li, Jian-Hua Wang, Ye-Ping Wu\* and Yu Liu\*

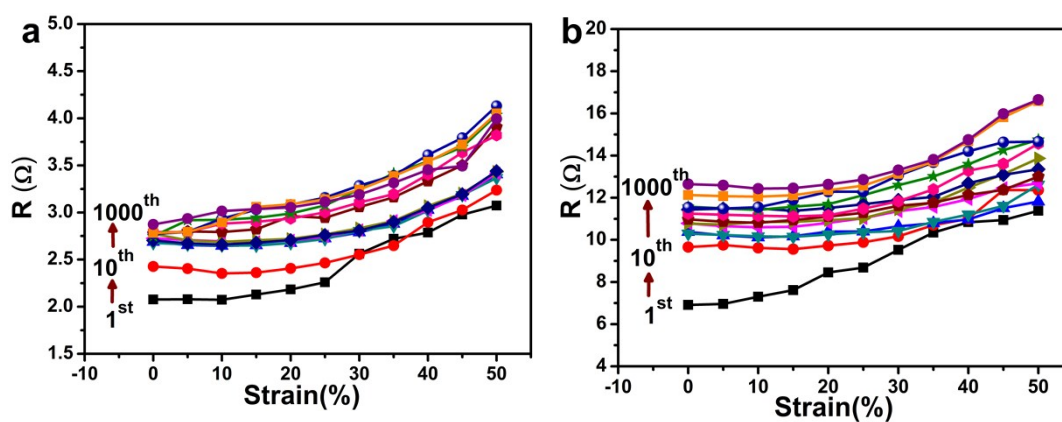

**Figure S1.** Resistance response of cotton-AgNWs-PDMS conductor prepared by a) one and b) two dip-coating cycles as a function of strain at different stretching cycles.

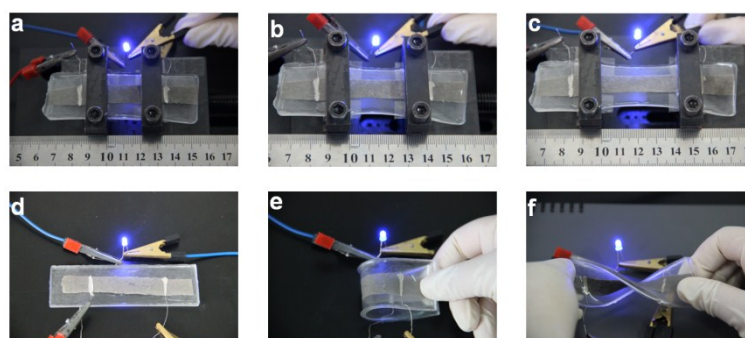

**Figure S2.** Pictures of a LED illuminated by using the cotton-AgNWs-PDMS film prepared with three dip-coating cycles as the connecting wire under a) 0%, b) 50%, c) 120% strain, d) no strain, e) bending and f) twisting.
